# Supplementary material for: Mental Health Mobile Apps for Preadolescents and Adolescents: A Systematic Review
Source: PubMed Central journal article supplement (PMC5465380; doi:10.2196/jmir.7332), 2017-05-25
Supplement: jmir_v19i5e176_app1.pdf [file jmir_v19i5e176_app1.pdf]

## Multimedia Appendix 1

List of databases and search strings used for systematic review

### APA PsychNET

for Any Field : " mobile health" OR " mobile device" OR ( ( mobile OR smart OR tablet ) NEAR/5 ( app\* OR application\* OR phone\* ) ) OR " mobile app" OR " smartphone" OR " mobile phone" AND Any Field : " depress\*" OR " self - harm" OR suicid\* OR anx\* OR " PTSD" OR " social anx\*" OR " separation anx\*" OR phobia OR " generalised anxiety disorder" OR " OCD" OR " conduct disorder" OR " eating disorder" OR anorexi\* OR bulimi\* OR " binge eating" OR " body image" OR " mental health\*" OR Schizophren\* OR " bipolar affective disorder" OR psychos\* OR " insomnia\*" OR stress\* AND Any Field : child\* OR teenage\* OR adolescen\* OR " young per\*" OR youth\* OR " young adult\*" AND Age Group : Childhood (birth to 12 yrs) OR Preschool Age (2 to 5 yrs) OR School Age (6 to 12 yrs) OR Adolescence (13 to 17 yrs) OR Young Adulthood ( 18 to 29 yrs ) AND Population Group : Human AND Year : 2008 To 2016

### ACM Digital Library

Searched for "mHealth\*" OR "m-health\*" OR "mobile health" OR "mobile device" OR "mobile app" OR "smartphone" OR "mobile phone" AND ("depress\*" OR "self - harm" OR suicid\* OR anx\* OR "PTSD" OR "social anx\*" OR "separation anx\*" OR phobia OR "generalised anxiety disorder" OR "OCD" OR "conduct disorder" OR "eating disorder" OR anorexi\* OR bulimi\* OR "binge eating" OR "body image" OR "mental health\*" OR Schizophren\* OR "bipolar affective disorder" OR psychos\* OR "insomnia\*" OR stress\*) AND (child\* OR teenage\* OR adolescen\* OR "young per\*" OR youth\* OR "young adult\*") [new search] [edit/save query] [advanced search]

Searched The ACM Full-Text Collection

Refinements Published since:2008

### Cochrane Library

"mHealth\*" OR "m-health\*" OR "mobile health" OR "mobile device" OR ((mobile OR smart OR tablet) NEAR/5 (app\* OR application\* OR phone\*)) OR "mobile app" OR "smartphone" OR "mobile phone" in Title, Abstract, Keywords and "depress\*" OR "self - harm" OR suicid\* OR anx\* OR "PTSD" OR "social anx\*" OR "separation anx\*" OR phobia OR "generalised anxiety disorder" OR "OCD" OR "conduct disorder" OR "eating disorder" OR anorexi\* OR bulimi\* OR "binge eating" OR "body image" OR "mental health\*" OR Schizophren\* OR "bipolar affective disorder" OR psychos\* OR "insomnia\*" OR stress\* in Title, Abstract, Keywords and child\* OR teenage\* OR adolescen\* OR "young per\*" OR youth\* OR "young adult\*" in Title, Abstract, Keywords , Publication Year from 2008 to 2016 in Cochrane Reviews'

"mHealth\*" OR "m-health\*" OR "mobile health" OR "mobile device" OR ((mobile OR smart OR tablet) NEAR/5 (app\* OR application\* OR phone\*)) OR "mobile app" OR "smartphone" OR "mobile phone" in Title, Abstract, Keywords and "depress\*" OR "self - harm" OR suicid\* OR anx\* OR "PTSD"

OR "social anxiety" OR "separation anxiety" OR phobia OR "generalised anxiety disorder" OR "OCD" OR "conduct disorder" OR "eating disorder" OR anorexia OR bulimia OR "binge eating" OR "body image" OR "mental health" OR Schizophrenia OR "bipolar affective disorder" OR psychoses OR "insomnia" OR stress\* in Title, Abstract, Keywords and child\* OR teenage\* OR adolescent\* OR "young people" OR youth\* OR "young adult\*" in Title, Abstract, Keywords, Publication Year from 2008 to 2016 in Trials'

### Community Care Inform (Children) 0 results

Home » Mental health » Search results for "((('mhealth\*' OR 'm-health\*' OR 'mobile health' OR 'mobile device' OR 'smartphone' OR 'mobile app' OR 'mobile phone') AND ('depress\*' OR 'self-harm' OR 'suicid\*' OR 'anxi\*' OR 'ptsd' OR 'social anxiety' OR 'separation anxiety' OR 'phobia' OR 'generalised anxiety disorder' OR 'ocd' OR 'conduct disorder' OR 'eating disorder' OR 'anorexia' OR 'bulimia' OR 'binge eating' OR 'body image' OR 'mental health\*' OR 'schizophrenia\*' OR 'bipolar affective disorder' OR 'psychoses\*' OR 'insomnia\*' OR stress\*)) AND ('child\*' OR 'teenage\*' OR 'adolescent\*' OR 'young people\*' OR 'youth\*' OR 'young adult\*'))"

### Embase

'mhealth\*' OR 'm-health\*' OR 'mobile health' OR 'mobile device' OR 'mobile app'/exp OR 'mobile app' OR 'smartphone'/exp OR 'smartphone' OR 'mobile phone'/exp OR 'mobile phone' AND ('depress\*' OR 'self-harm' OR 'suicid\*' OR 'anxi\*' OR 'ptsd'/exp OR 'ptsd' OR 'social anxiety' OR 'separation anxiety' OR 'phobia'/exp OR 'phobia' OR 'generalised anxiety disorder'/exp OR 'generalised anxiety disorder' OR 'ocd' OR 'conduct disorder'/exp OR 'conduct disorder' OR 'eating disorder'/exp OR 'eating disorder' OR 'anorexia' OR 'bulimia' OR 'binge eating' OR 'body image'/exp OR 'body image' OR 'mental health\*' OR 'schizophrenia\*' OR 'bipolar affective disorder'/exp OR 'bipolar affective disorder' OR 'psychoses\*' OR 'insomnia\*' OR stress\*) AND ('child\*' OR 'teenage\*' OR 'adolescent\*' OR 'young people\*' OR 'youth\*' OR 'young adult\*') AND [english]/lim AND ([child]/lim OR [preschool]/lim OR [school]/lim OR [adolescent]/lim OR [young adult]/lim) AND [humans]/lim AND [2008-2016]/py

### Index to Thesis (ProQuest)

("mHealth\*" OR "m-health\*" OR "mobile health" OR "mobile device" OR (mobile OR smart OR tablet) NEAR/5 (app\* OR application\* OR phone\*)) OR "mobile app" OR "smartphone" OR "mobile phone") AND ("depress\*" OR "self-harm" "suicid\*" "anxi\*" "PTSD" "social anxiety" "separation anxiety" "phobia" "generalised anxiety disorder" "OCD" "conduct disorder" "eating disorder" "anorexia" "bulimia" "binge eating" "body image" "mental health\*" "schizophrenia\*" "bipolar affective disorder" "psychoses" "insomnia\*" "stress") AND ("child\*" OR "teenage\*" "adolescent\*" "young people\*" "youth\*" "young adult\*") Filters activated: Publication date: 2008 - 2016 Subject: Children & youth OR mental health OR teenagers OR adolescent OR smartphones OR young adult OR child OR mental disorders OR mental depression

### PubMed

((("mHealth\*" OR "m-health\*" OR "mobile health" OR "mobile device" OR ((mobile OR smart OR tablet) near/5 (app\* OR application\* OR phone\*)) OR "mobile app" OR "smartphone" OR "mobile

phone")) AND ("depress\*" OR "self - harm" OR suicid\* OR anxi\* OR "PTSD" OR "social anxi\*" OR "separation anxi\*" OR phobia OR "generalised anxiety disorder" OR "OCD" OR "conduct disorder" OR "eating disorder" OR anorexia\* OR bulimi\* OR "binge eating" OR "body image" OR "mental health\*" OR Schizophren\* OR "bipolar affective disorder" OR psychos\* OR "insomnia\*" OR stress\*) AND (child\* OR teenage\* OR adolescen\* OR "young per\*" OR youth\* OR "young adult\*") Filters activated: Publication date from 2008/01/01 to 2016/12/31, Humans, English, Child: birth-18 years, Adult: 19+ years

### Scopus

( TITLE-ABS-KEY ( "mHealth\*" OR "m-health\*" OR "mobile health" OR "mobile device" OR "smartphone" OR "mobile app" OR "mobile phone" ) AND TITLE-ABS-KEY ( "depress\*" OR "self -- harm" OR "suicid\*" OR "anxi\*" OR "PTSD" OR "social anxi\*" OR "separation anxi\*" OR "phobia" OR "generalised anxiety disorder" OR "OCD" OR "conduct disorder" OR "eating disorder" OR "anorexi\*" OR "bulimi\*" OR "binge eating" ) OR TITLE-ABS-KEY ("body image" OR "mental health\*" OR "schizophren\*" OR "bipolar affective disorder" OR "psychos\*" OR "insomnia\*" OR "stress\*") ) AND TITLE-ABS-KEY ( "child\*" OR "teenage\*" OR "adolescenc\*" OR "young per\*" OR "youth\*" OR "young adult\*" ) ) AND PUBYEAR > 2007 AND ( LIMIT-TO ( LANGUAGE , "English" ) )

### Social Policy and Practice (Ovid search)

((("mHealth\*" or "m-health\*" or "mobile health" or "mobile device" or "smartphone" or "mobile app" or "mobile phone") and ("depress\*" or "self - harm" or "suicid\*" or "anxi\*" or "PTSD" or "social anxi\*" or "separation anxi\*" or "phobia" or "generalised anxiety disorder" or "OCD" or "conduct disorder" or "eating disorder" or "anorexi\*" or "bulimi\*" or "binge eating" or "body image" or "mental health\*" or "Schizophren\*" or "bipolar affective disorder" or "psychos\*" or "insomnia\*" or stress\*)) and ("child\*" or "teenage\*" or "adolescenc\*" or "young per\*" or "youth\*" or "young adult\*")) limit 1 to yr="2008 -Current"

### Web of Science

("mHealth\*" OR "m-health\*" OR "mobile health" OR "mobile device" OR (mobile OR smart OR tablet) NEAR/5 (app\* OR application\* OR phone\*) OR "mobile app" OR "smartphone" OR "mobile phone") AND TOPIC: ("depress\*" OR "self - harm" OR suicid\* OR anxi\* OR "PTSD" OR "social anxi\*" OR "separation anxi\*" OR phobia OR "generalised anxiety disorder" OR "OCD" OR "conduct disorder" OR "eating disorder" OR anorexi\* OR bulimi\* OR "binge eating" OR "body image" OR "mental health\*" OR Schizophren\* OR "bipolar affective disorder" OR psychos\* OR "insomnia\*" OR stress\*) AND TOPIC: (child\* OR teenage\* OR adolescen\* OR "young per\*" OR youth\* OR "young adult\*") Timespan: 2008-2016. Indexes: SCI-EXPANDED, SSCI, A&HCI, CPCI-S, CPCI-SSH, BKCI-S, BKCI-SSH, ESCI.

### Google Scholar

'mhealth\*' OR 'm-health\*' OR 'mobile app' AND 'depressed\*' OR 'self - harm' OR 'suicide\*' OR 'anxi\*' OR 'conduct disorder' OR 'eating disorder' OR 'mental health\*' OR 'schizophren\*' OR 'bipolar' OR 'psychos\*' AND 'child\*' OR 'teenage\*' OR 'adolescent\*' LIMIT DATE RANGE 2008 - 2016

### **OpenGrey**

"mHealth\*" OR "m-health\*" OR "mobile health" OR "mobile device" OR ((mobile OR smart OR tablet) NEAR/5 (app\* OR application\* OR phone\*)) OR "mobile app" OR "smartphone" OR "mobile phone")) AND ("depress\*" OR "self - harm" OR suicid\* OR anxi\* OR "PTSD" OR "social anxi\*" OR "separation anxi\*" OR phobia OR "generalised anxiety disorder" OR "OCD" OR "conduct disorder" OR "eating disorder" OR anorexi\* OR bulimi\* OR "binge eating" OR "body image" OR "mental health\*" OR Schizophren\* OR "bipolar affective disorder" OR psychos\* OR "insomnia\*" OR stress\*) AND (child\* OR teenage\* OR adolescen\* OR "young per\*" OR youth\* OR "young adult\*")

### **Journal of Medical Internet Research (all publications)**

"mHealth\*" OR "m-health\*" OR "mobile health" OR "mobile device" OR "mobile app" OR "smartphone" OR "mobile phone" AND child\* OR teenage\* OR adolescen\* OR "young per\*" OR youth\* OR "young adult\*" AND mental health.

### **Cyberpsychology, behavior and social networking**

"mHealth\*" OR "m-health\*" OR "mobile health" OR "mobile device" OR ((mobile OR smart OR tablet) NEAR/5 (app\* OR application\* OR phone\*)) OR "mobile app" OR "smartphone" OR "mobile phone" AND ("depress\*" OR "self - harm" OR suicid\* OR anxi\* OR "PTSD" OR "social anxi\*" OR "separation anxi\*" OR phobia OR "generalised anxiety disorder" OR "OCD" OR "conduct disorder" OR "eating disorder" OR anorexi\* OR bulimi\* OR "binge eating" OR "body image" OR "mental health\*" OR Schizophren\* OR "bipolar affective disorder" OR psychos\* OR "insomnia\*" OR stress\*) AND (child\* OR teenage\* OR adolescen\* OR "young per\*" OR youth\* OR "young adult\*") Search limits dates Jan 2008 - Dec 2016; Language - English.

### **Internet Interventions**

"mHealth\*" OR "m-health\*" OR "mobile health" OR "mobile device" OR ((mobile OR smart OR tablet) NEAR/5 (app\* OR application\* OR phone\*)) OR "mobile app" OR "smartphone" OR "mobile phone"

Hand searched volumes 1 - 4.
